# Supplementary material
Source: PubMed Central journal article supplement (PMC4632991)
Supplement: NIHMS733040-supplement-SI.pdf [file NIHMS733040-supplement-SI.pdf]

## Supporting Information

### **3D cell entrapment as a function of the weight percent of peptide-amphiphile hydrogels**

Carolyn M. Scott,<sup>a</sup> Colleen L. Forster,<sup>b</sup> and Efrosini Kokkoli<sup>\*c</sup>

<sup>a</sup>Department of Biomedical Engineering,

<sup>b</sup>BioNet, Academic Health Center,

<sup>c</sup>Department of Chemical Engineering and Materials Science,

University of Minnesota, Minneapolis, MN, 55455, USA.

Corresponding author:

Efrosini Kokkoli

Tel: +1 (612) 626-1185, fax: +1 (612) 626-7246

e-mail: kokkoli@umn.edu

## Movies

Movies showing 3D reconstruction of z-stack confocal images from  $1.35 \times 10^6$  NIH3T3/GFP cells/mL entrapped for different time points in a 0.5 wt% or 1.0 wt% of 5 mol% PR<sub>g</sub> and 95 mol% E2 peptide-amphiphile hydrogel. Live NIH3T3/GFP cells express green fluorescent protein:

**Movie S1** (1a5b00196\_si\_002.avi). NIH3T3/GFP fibroblasts entrapped in a 0.5 wt% peptide-amphiphile hydrogel after 3 h.

**Movie S2** (1a5b00196\_si\_003.avi). NIH3T3/GFP fibroblasts entrapped in a 0.5 wt% peptide-amphiphile hydrogel after 24 h.

**Movie S3** (1a5b00196\_si\_004.avi). NIH3T3/GFP fibroblasts entrapped in a 0.5 wt% peptide-amphiphile hydrogel after 48 h.

**Movie S4** (1a5b00196\_si\_005.avi). NIH3T3/GFP fibroblasts entrapped in a 0.5 wt% peptide-amphiphile hydrogel after 72 h.

**Movie S5** (1a5b00196\_si\_006.avi). NIH3T3/GFP fibroblasts entrapped in a 0.5 wt% peptide-amphiphile hydrogel after 5 d.

**Movie S6** (1a5b00196\_si\_007.avi). NIH3T3/GFP fibroblasts entrapped in a 1.0 wt% peptide-amphiphile hydrogel after 3 h.

**Movie S7** (1a5b00196\_si\_008.avi). NIH3T3/GFP fibroblasts entrapped in a 1.0 wt% peptide-amphiphile hydrogel after 24 h.

**Movie S8** (1a5b00196\_si\_009.avi). NIH3T3/GFP fibroblasts entrapped in a 1.0 wt% peptide-amphiphile hydrogel after 48 h.

**Movie S9** (1a5b00196\_si\_010.avi). NIH3T3/GFP fibroblasts entrapped in a 1.0 wt% peptide-amphiphile hydrogel after 72 h.

**Movie S10** (1a5b00196\_si\_011.avi). NIH3T3/GFP fibroblasts entrapped in a 1.0 wt% peptide-amphiphile hydrogel after 5 d.

## Tables

**Table S1.** P-values from the ANOVA analysis of fluorescence signal from the NIH3T3/GFP fibroblasts entrapped in 0.5 wt% or 1.0 wt% of 5 mol% PR<sub>g</sub> and 95 mol% E2 peptide-amphiphile hydrogels over time, shown in Figure 5.

| <b>0.5 wt% Gels</b> |            |             |             |             |               |
|---------------------|------------|-------------|-------------|-------------|---------------|
|                     | <b>3 h</b> | <b>24 h</b> | <b>48 h</b> | <b>72 h</b> | <b>5 days</b> |
| <b>3 h</b>          |            | > 0.05      | < 0.001     | < 0.001     | < 0.001       |
| <b>24 h</b>         |            |             | < 0.001     | < 0.001     | < 0.001       |
| <b>48 h</b>         |            |             |             | < 0.05      | < 0.001       |
| <b>72 h</b>         |            |             |             |             | < 0.001       |
| <b>5 days</b>       |            |             |             |             |               |
| <b>1.0 wt% Gels</b> |            |             |             |             |               |
|                     | <b>3 h</b> | <b>24 h</b> | <b>48 h</b> | <b>72 h</b> | <b>5 days</b> |
| <b>3 h</b>          |            | > 0.05      | < 0.05      | < 0.001     | < 0.001       |
| <b>24 h</b>         |            |             | < 0.05      | < 0.001     | < 0.001       |
| <b>48 h</b>         |            |             |             | < 0.01      | < 0.001       |
| <b>72 h</b>         |            |             |             |             | < 0.001       |
| <b>5 days</b>       |            |             |             |             |               |

**Table S2.** P-values from the ANOVA analysis of fluorescence signal from the NIH3T3/GFP fibroblasts entrapped in 0.5 wt% or 1.0 wt% of 5 mol% PR<sub>g</sub> and 95 mol% E2 peptide-amphiphile hydrogels over time, shown in Figure 5.

| <b>0.5 wt% vs. 1.0 wt% Gels</b> |        |
|---------------------------------|--------|
| <b>3 h</b>                      | > 0.05 |
| <b>24 h</b>                     | > 0.05 |
| <b>48 h</b>                     | < 0.01 |
| <b>72 h</b>                     | < 0.05 |
| <b>5 days</b>                   | < 0.01 |

## Figures

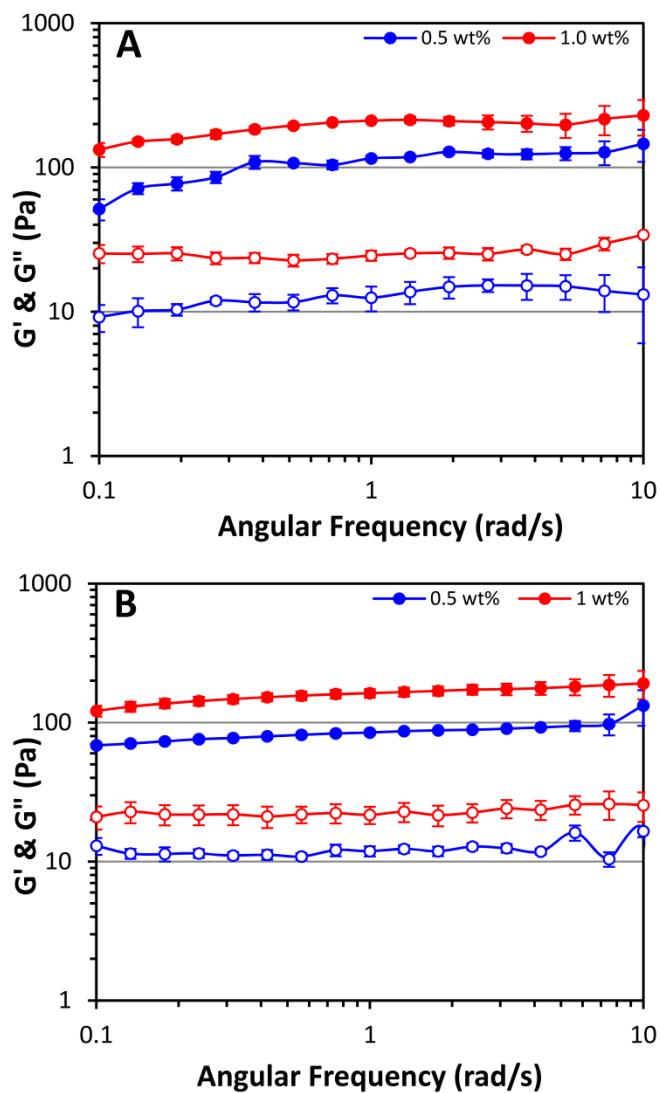

**Figure S1.** Rheology of 5 mol% PR<sub>g</sub> - 95 mol% E2 peptide-amphiphile hydrogels containing (A)  $6.75 \times 10^5$  NIH3T3/GFP fibroblasts per mL, and (B)  $1.35 \times 10^6$  NIH3T3/GFP fibroblasts per mL. Data are shown as the mean  $\pm$  standard error from 3 independent experiments ( $n=3$ ). Filled symbols represent the storage modulus ( $G'$ ) and open symbols represent the loss modulus ( $G''$ ).

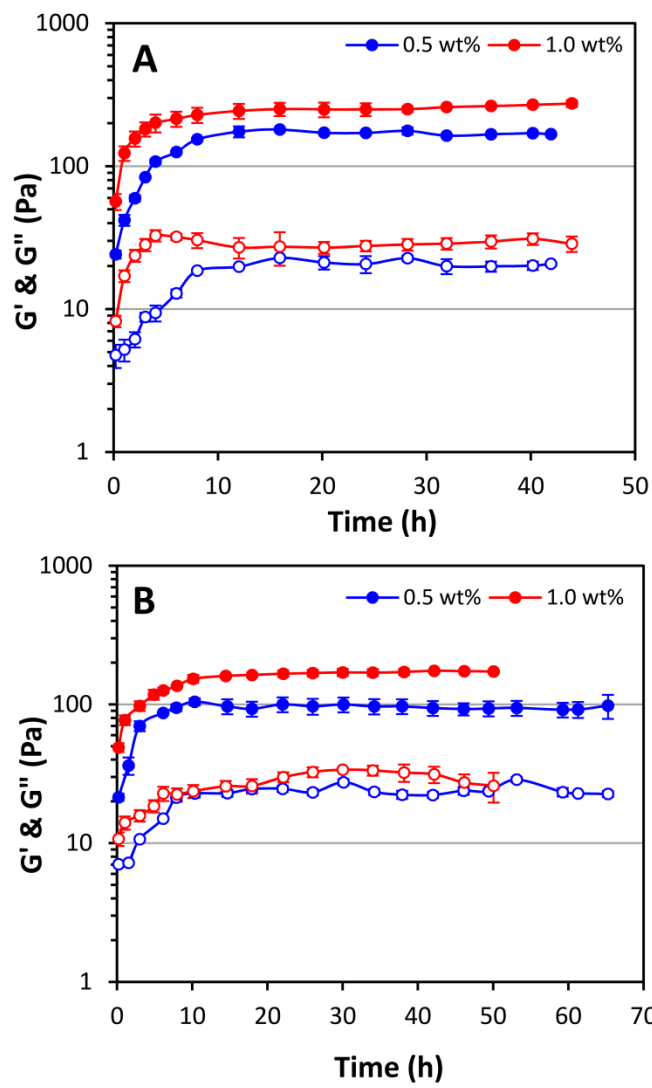

**Figure S2.** Rheology of 5 mol% PR<sub>g</sub> - 95 mol% E2 peptide-amphiphile hydrogels (A) without and (B) with entrapped  $1.35 \times 10^6$  NIH3T3/GFP fibroblasts/mL. Data are shown as the mean  $\pm$  standard deviation from 2 independent experiments ( $n=2$ ). Filled symbols represent the storage modulus ( $G'$ ) and open symbols represent the loss modulus ( $G''$ ).

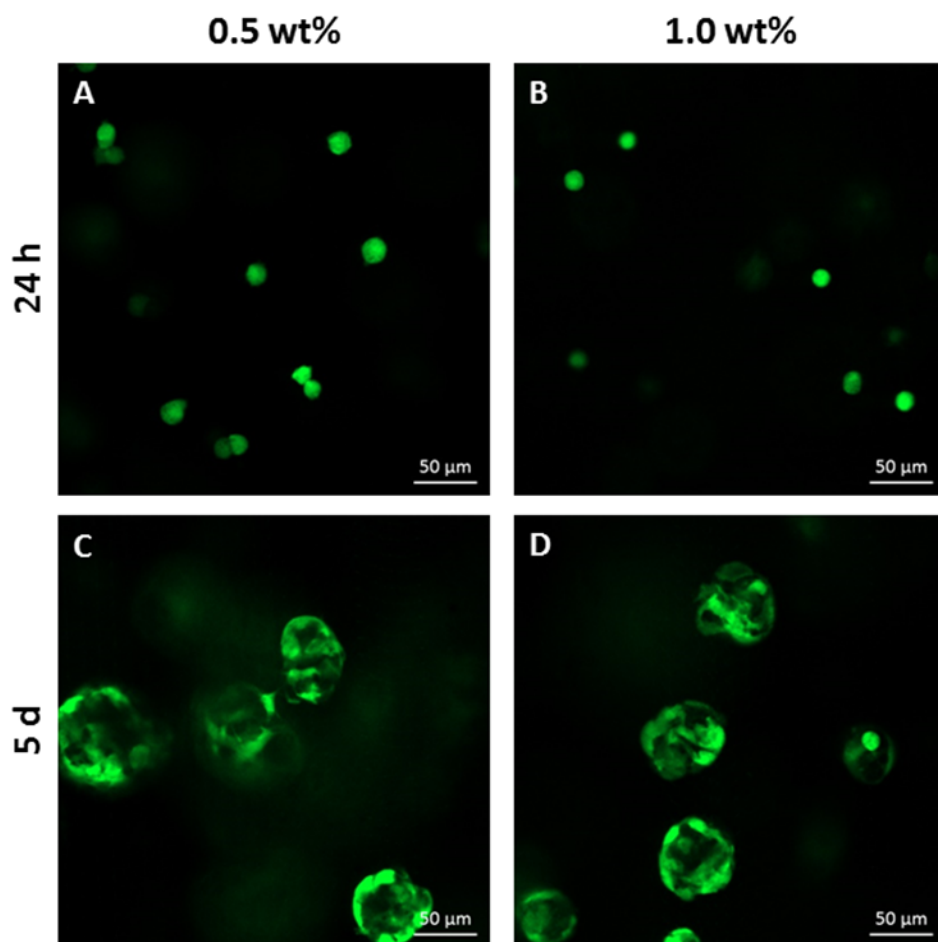

**Figure S3.** Confocal images of NIH3T3/GFP fibroblasts in 5 mol% PR<sub>g</sub> - 95 mol% E2 peptide-amphiphile hydrogels. Images shown are from 0.5 wt% and 1.0 wt% gels after 24 h (A, B) and 5 days (C, D). NIH3T3/GFP cells are shown in green.

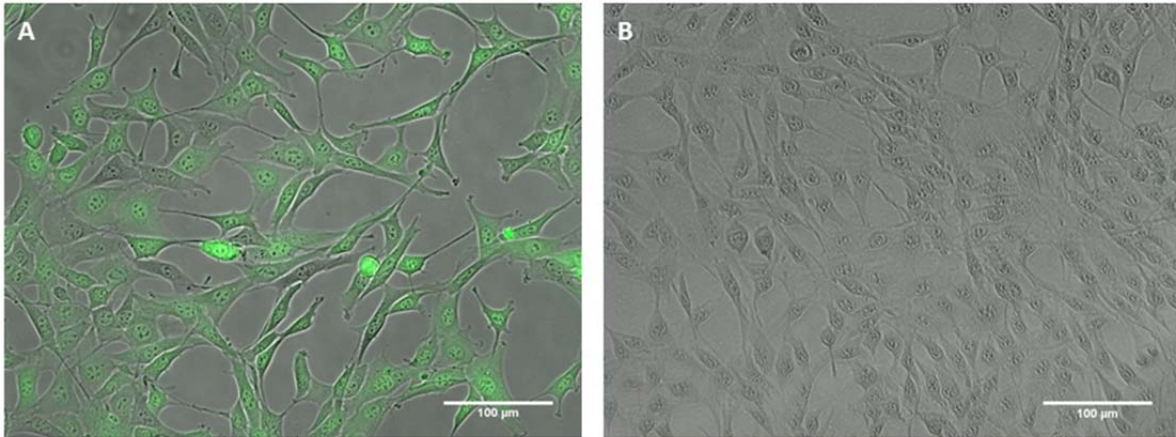

**Figure S4.** Fluorescence overlay on phase images of NIH3T3/GFP fibroblasts. (A) Live cells and (B) cells killed after exposure to 30% ethanol for 5 min.

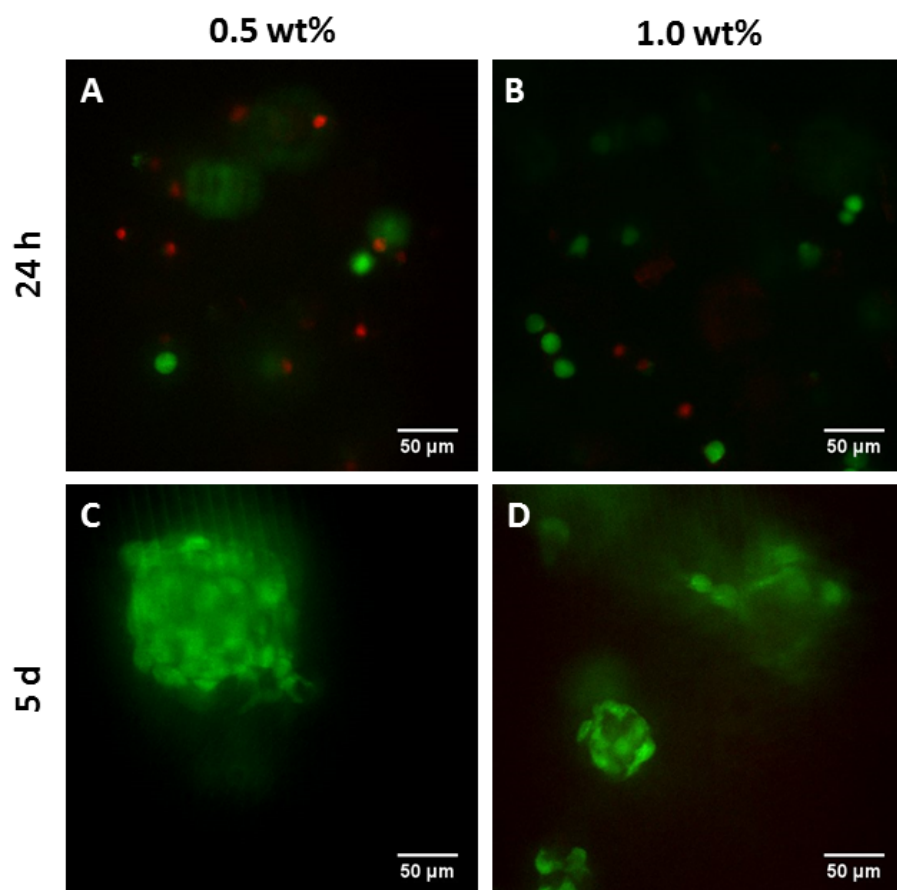

**Figure S5.** Confocal images of NIH3T3 fibroblasts entrapped in 5 mol% PR<sub>g</sub> - 95 mol% E2 peptide-amphiphile hydrogels and evaluated with the Live/Dead cell viability assay. Both the 0.5 wt% and 1.0 wt% gels were examined at 24 h (A, B) and 5 days (C, D). Green cells are alive and red cells are dead.
